# Supplementary material for: Multi-spectroscopic study of electrochemically-formed oxide-derived gold electrodes
Source: Royal Society of Chemistry journal article supplement (doi:10.1039/d3cp04009g), 2023-12-12
Supplement: d3cp04009g2.pdf [file d3cp04009g2.pdf]

# Supporting Information:

## Multi-spectroscopy study of electrochemically-formed oxide-derived gold electrodes

Sara Boscolo Bibi,<sup>†,@</sup> Ahmed M. El-Zohry,<sup>\*,‡,†,@</sup> Bernadette Davies,<sup>†,¶</sup> Vladimir Grigorev,<sup>†</sup> Christopher M. Goodwin,<sup>†,§</sup> Patrick Lömker,<sup>†</sup> Alexander Holm,<sup>†,||</sup> Harri Ali-Löytty,<sup>⊥</sup> Fernando Garcia-Martinez,<sup>#</sup> Christoph Schlueter,<sup>#</sup> Markus Soldemo,<sup>†</sup> Sergey Koroidov,<sup>\*,†</sup> and Tony Hansson<sup>\*,†</sup>

<sup>†</sup>*Department of Physics, AlbaNova University Center, Stockholm University, 10691 Stockholm, Sweden.*

<sup>‡</sup>*Present address: Center for Integrative Petroleum Research, King Fahd University of Petroleum and Minerals, 31261 Dhahran, Kingdom of Saudi Arabia*

<sup>¶</sup>*Department of Materials and Environmental Chemistry, Stockholm University, Svante Arrhenius väg 16C, 114 18 Stockholm, Sweden.*

<sup>§</sup>*Present address: CELLS-ALBA, 08290 Cerdanyola del Vallès, Barcelona, Spain*

<sup>||</sup>*Present address: Department of Materials and Environmental Chemistry, Stockholm University, Svante Arrhenius väg 16C, 114 18 Stockholm, Sweden.*

<sup>⊥</sup>*Surface Science Group, Photonics Laboratory, Tampere University, P.O. Box 692, FI-33014 Tampere University, Finland*

<sup>#</sup>*Photon Science, Deutsches Elektronen-Synchrotron (DESY), 22607 Hamburg, Germany*

<sup>@</sup>*Contributed equally to this work*

E-mail: ahmed.elzohry@kfupm.edu.sa; sergey.koroidov@fysik.su.se; tony.hansson@fysik.su.se

# Supplementary figures

## Electrochemical cell representation with SFG output

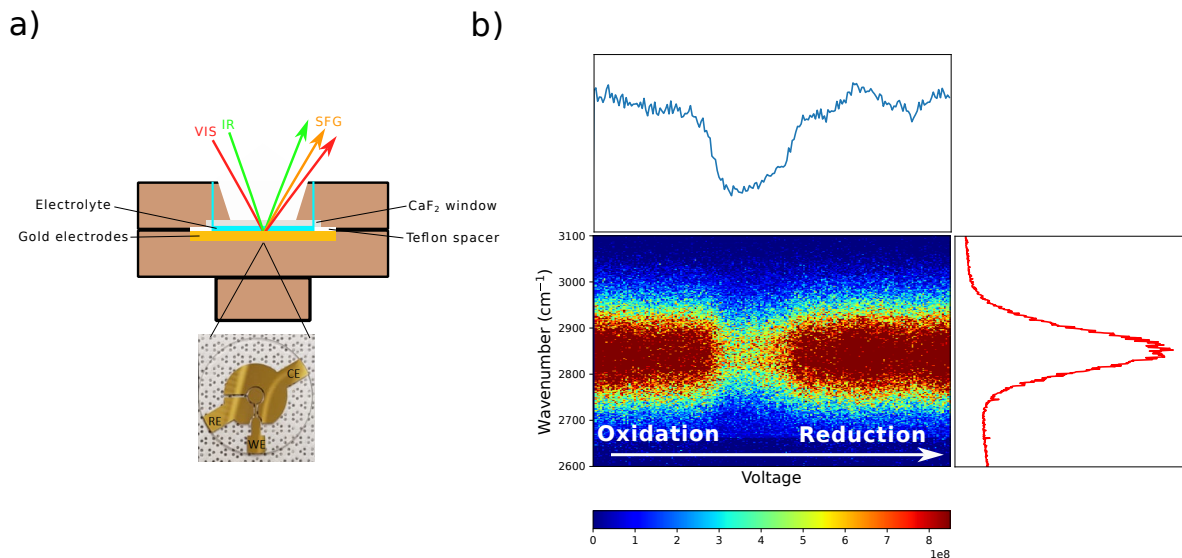

Figure S1: (a) Top - Schematic design of the EC highlighting the main parts. Bottom - Three polycrystalline gold electrodes (WE, CE, and RE) deposited on a quartz plate. (b) SFG spectrum of gold as a function of voltage. The side panels show the projected intensity on the axes.

## Protocol 1: Electrochemical annealing before SFG measurements

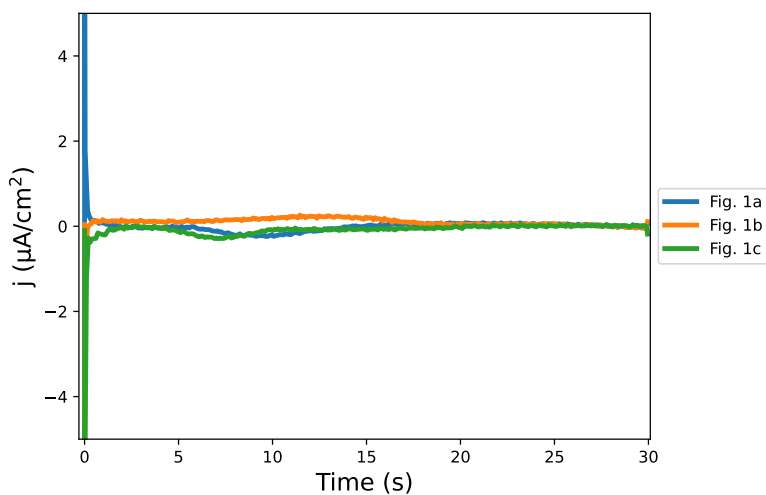

Figure S2: Preparation step (CA at 0.7 V vs. SHE) for the measurements in Figure 1 a-c.

## Protocol 2: Chronoamperometric measurements for steps 1 and 2

before SFG measurements

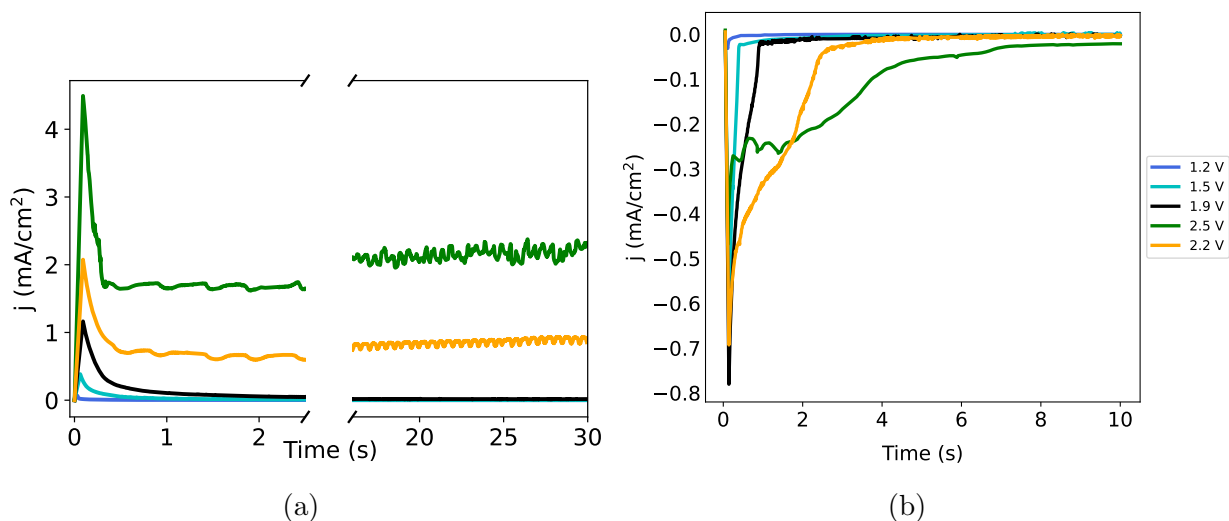

Figure S3: Additional points of the protocol summarized in figure 4 of the main article. a) Step 1: CAs vs. SHE in H<sub>3</sub>PO<sub>4</sub> at various oxidation potentials from 1.2 V and up, where the increase in current density seen is due to the growth of gold oxide and the OER. b) Step 2: CA at 0.7 V after holding the positive potentials shown in (a).

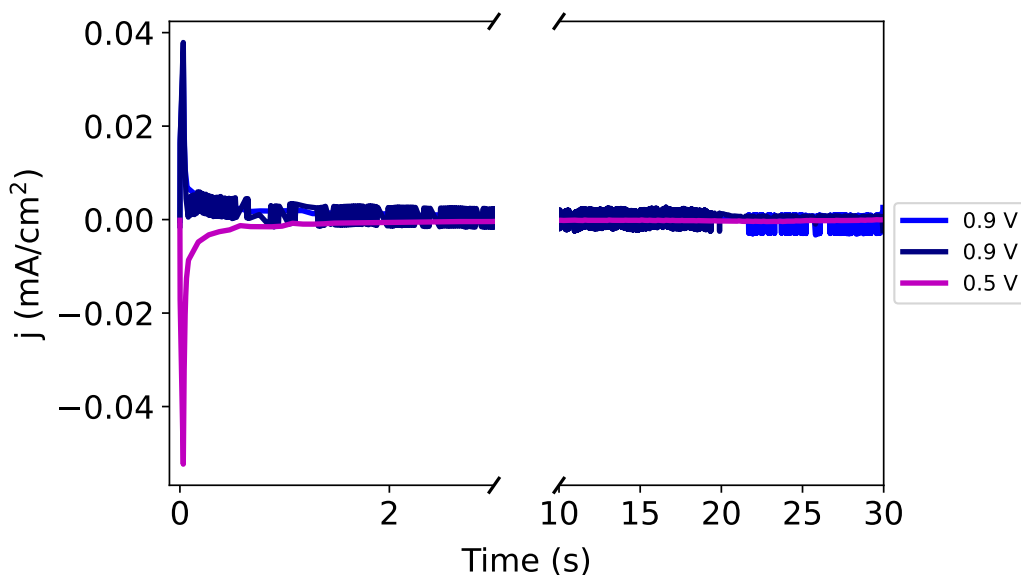

Figure S4: Additional points of the protocol summarized in figure 4 of the main article. Comparison of the CAs vs. SHE from step 1: 0.9 V held before (bright blue) and after (dark blue) the set of measurements for 2.2 V, showing the same trend. This is compared to the CA done at 0.5 V (violet), which matches the neat gold state shown by SFG.

## Protocol 2: Chronoamperometric measurements for steps 1 and 2

### before HP-XPS measurements

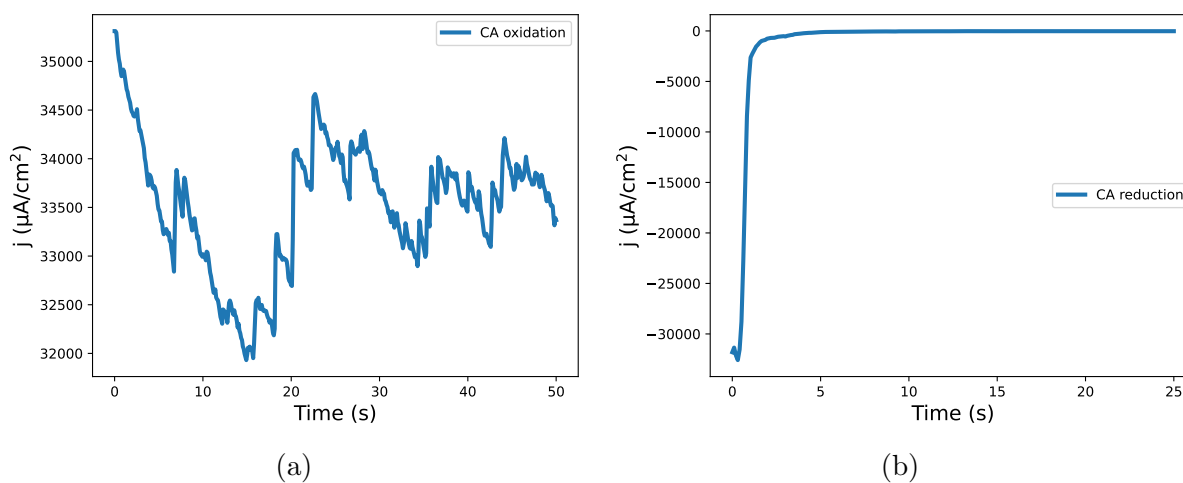

Figure S5: Electrochemical treatment done before collecting the HP-XPS spectra in Figure 6. a) CA at 2.5 V vs. SHE to oxidize the gold surface. b) CA at 0.7 V vs. SHE to reduce the oxide formed in a).

### Additional HP-XPS spectra

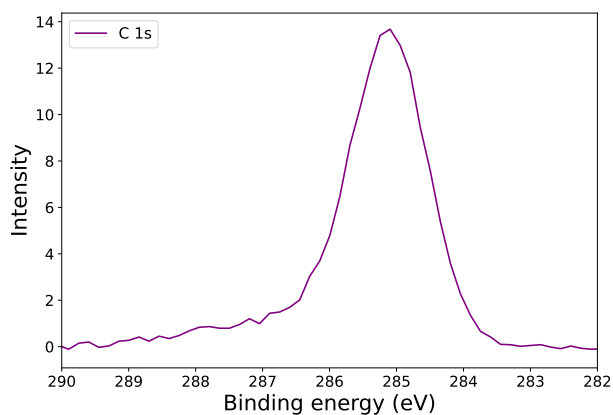

Figure S6: C 1s spectrum collected to check the possible presence of contaminants on the gold surface.

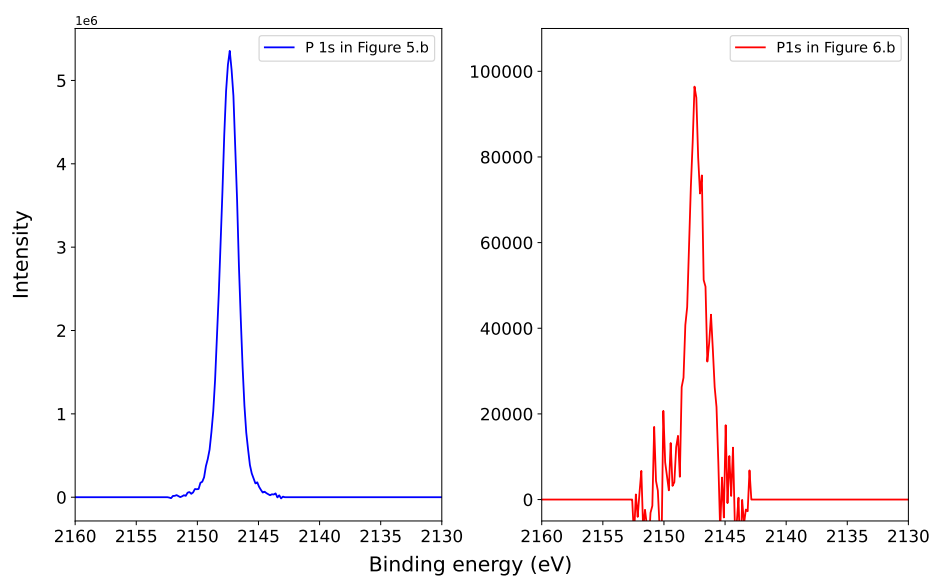

Figure S7: P 1s spectra collected together with Au 4*f* and O 1s spectra. The integrated intensity of the only peak in P 1s core-level region was used to calculate the contribution of  $\text{H}_2\text{PO}_4^-$  in the O 1s spectra (more details in the main text, Figs. 5.b and 6.b). A Shirley background was subtracted.
