# Supplementary figures and images for: Multi-spectroscopic study of electrochemically-formed oxide-derived gold electrodes
Source: Royal Society of Chemistry journal article supplement (doi:10.1039/d3cp04009g), 2023-12-12

a)

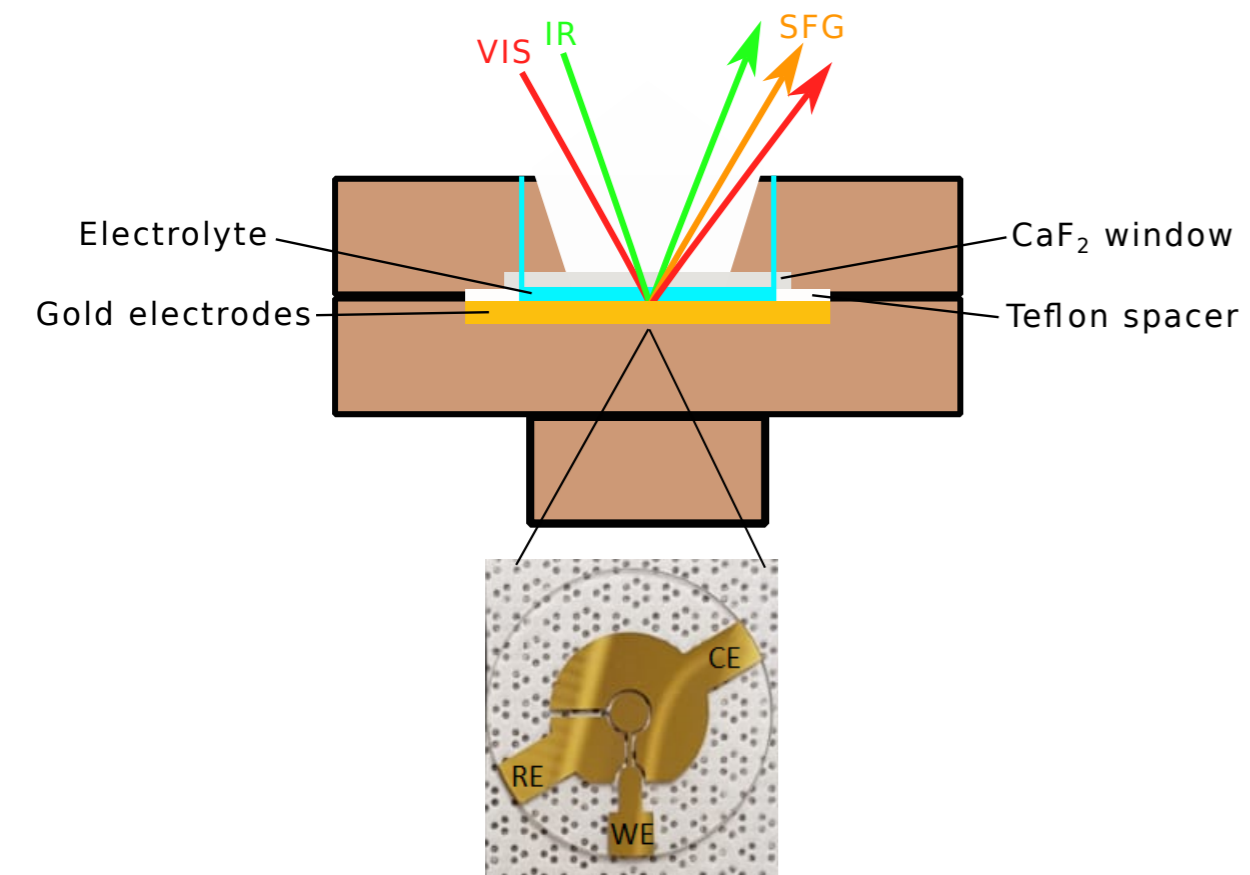

b)

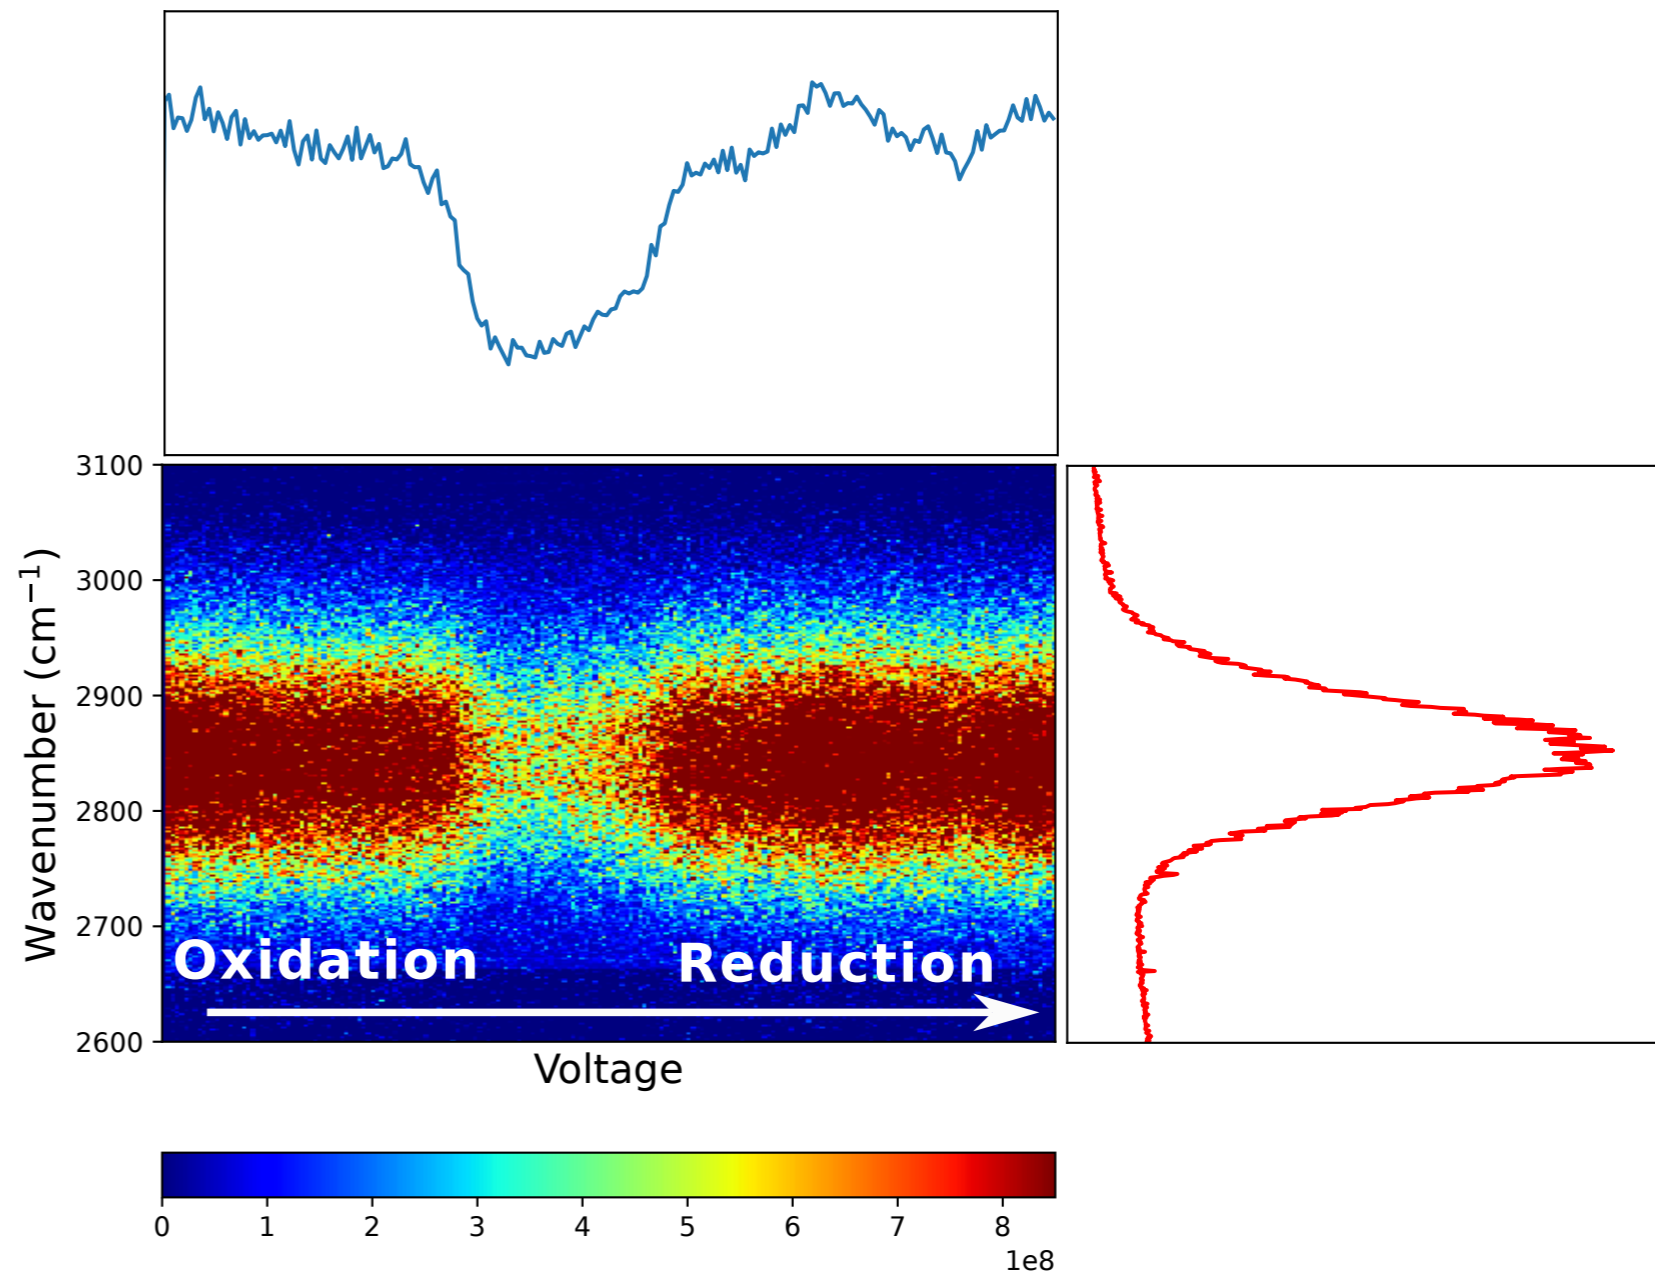

Supplement: d3cp04009g1.pdf [file d3cp04009g1.pdf]
